# Supplementary material for: Genomic insights into the ESBL and MCR-1-producing ST648 Escherichiacoli with multi-drug resistance
Source: PubMed Central journal article supplement (PMC4899488; doi:10.1007/s11434-016-1086-y), 2016-05-19
Supplement: 11434_2016_1086_MOESM1_ESM.pdf [file 11434_2016_1086_MOESM1_ESM.pdf]

## Supplemental Material

1  
2  
3  
4

### Supplemental tables

**Table S1** General features of three *E. coli* genomes

| Organization and characterization of the genomes | Strains          |                  |                  |
|--------------------------------------------------|------------------|------------------|------------------|
|                                                  | E15004           | E15015           | E15017           |
| <b>General features</b>                          |                  |                  |                  |
| Sequenced size (bp)                              | 4,834,707        | 5,135,345        | 5,176,582        |
| Assembled size (bp)                              | <b>4,643,275</b> | <b>4,637,424</b> | <b>4,780,540</b> |
| GC content (%)                                   | 50.49            | 50.38            | 50.42            |
| Total number of contigs                          | 59               | 142              | 63               |
| Total number of unordered contigs                | 10               | 59               | 18               |
| <b>Function category</b>                         |                  |                  |                  |
| Total number of SNPs                             | 65495            | 67563            | 113999           |
| Total number of complete CDS                     | 2593             | 2607             | 2502             |
| Total Number of altered CDS                      | 1726             | 1712             | 1817             |
| Percent bases missed in reference                | 9.52%            | 9.70%            | 10.93%           |
| Percent bases extra in unordered contigs         | 10.69%           | 9.88%            | 16.74%           |

5  
6  
7  
8  
9

**Table S2** List of drug resistance genes identified in the *mcr-1*-positive strain E15015

| Resistance genes | Length (bp) | Contigs    | Functions/phenotypes                                                 |
|------------------|-------------|------------|----------------------------------------------------------------------|
| <i>aadA5</i>     | 789         | Contig_102 | Aminoglycoside adenylyl-transferase AadA5, Aminoglycoside resistance |
| <i>strA</i>      | 804         | Contig_84  | Aminoglycoside resistance, <i>aph(3'')</i> -Ib                       |
| <i>strB</i>      | 837         | Contig_84  | Aminoglycoside resistance, <i>aph(6)</i> -Id                         |
| <i>blaTEM-1A</i> | 861         | Contig_84  | $\beta$ -lactam resistance                                           |
| <i>oqxB</i>      | 2450        | Contig_124 | Quinolone resistance                                                 |
| <i>qnrS1</i>     | 657         | Contig_139 | Quinolone resistance                                                 |
| <i>floR</i>      | 1215        | Contig_62  | Phenicol resistance                                                  |
| <i>sul2</i>      | 816         | Contig_84  | Sulphonamide resistance                                              |
| <i>tet(A)</i>    | 1172        | Contig_84  | Tetracycline resistance                                              |
| <i>dfrA17</i>    | 474         | Contig_102 | dihydrofolate reductase DfrA17, Trimethoprim resistance              |

10

11 **Supplemental figures**

12

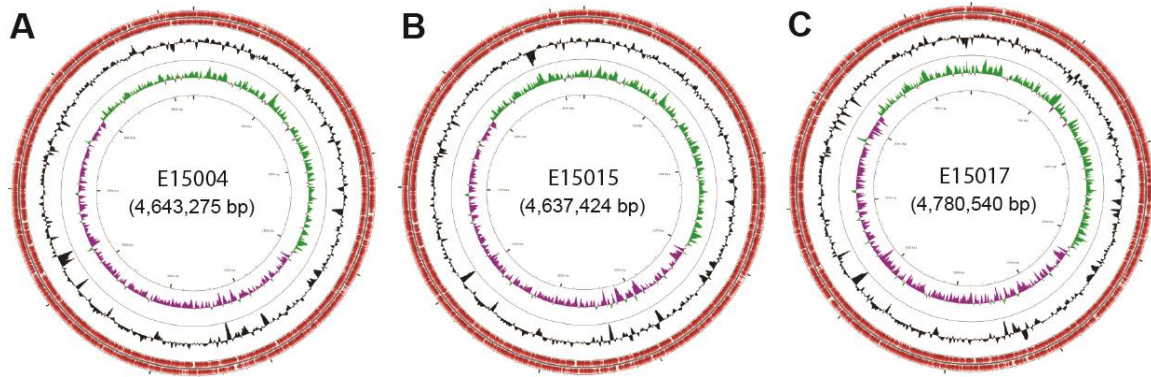

13

14

15 **Figure S1** Circular representation of the three assembled genomes (E15004,  
16 E15015 and E15017)

17

18 The genome maps of E15004 (**A**), E15015 (**B**) and E15017 (**C**) were generated  
19 with CGViewer ([http://stothard.afns.ualberta.ca/cgview\\_server/](http://stothard.afns.ualberta.ca/cgview_server/)).

20 Individual rings ranging from 1 (inner ring) to 3 (outer ring) separately denote GC  
21 Skew (Green: GC skew+; Magenta: GC skew-), GC contents, and putative ORF.

22

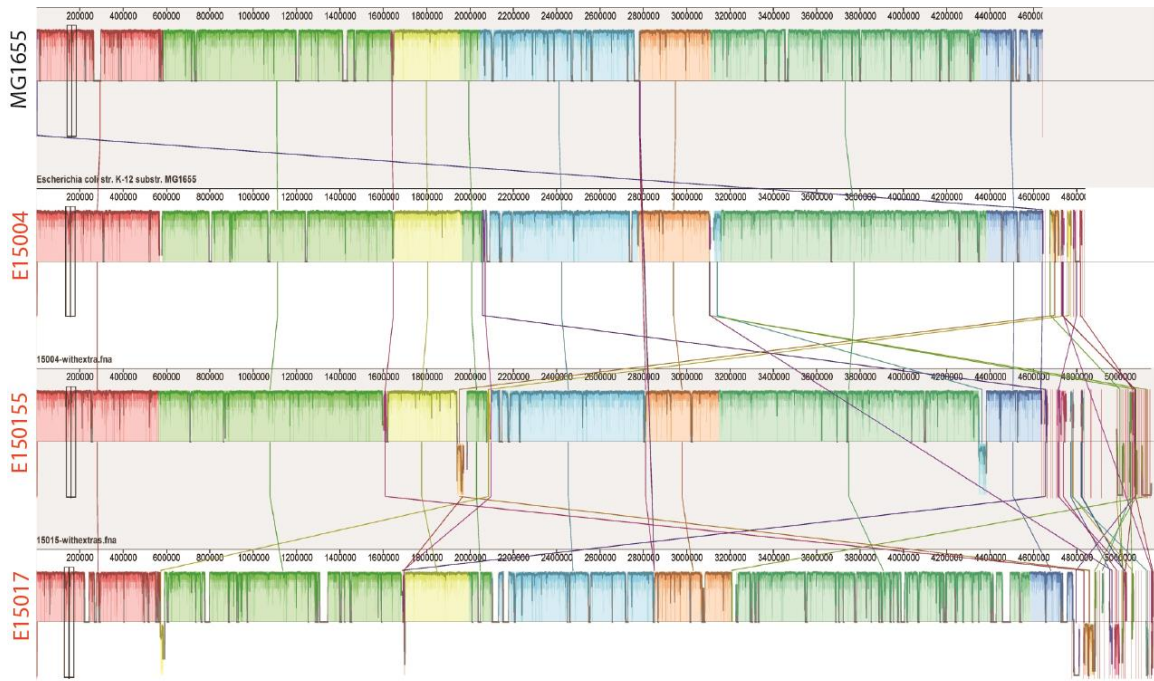

23

24

25 **Figure S2** Linear genomic comparison of the three *micr-1*-positive *E. coli* isolates  
 26 (E15004, E15015 and E15017) to the reference strain MG1655

27

28 The colored blocks represent Locally Collinear Blocks (LCBs) which share  
 29 homology between strains. Lines connecting individual LCBs show their location  
 30 in the other genomes. Line plot inside each LCB shows local conservation in  
 31 reference strain. Additional unordered contigs of sequenced genomes appear at  
 32 right edge.

33

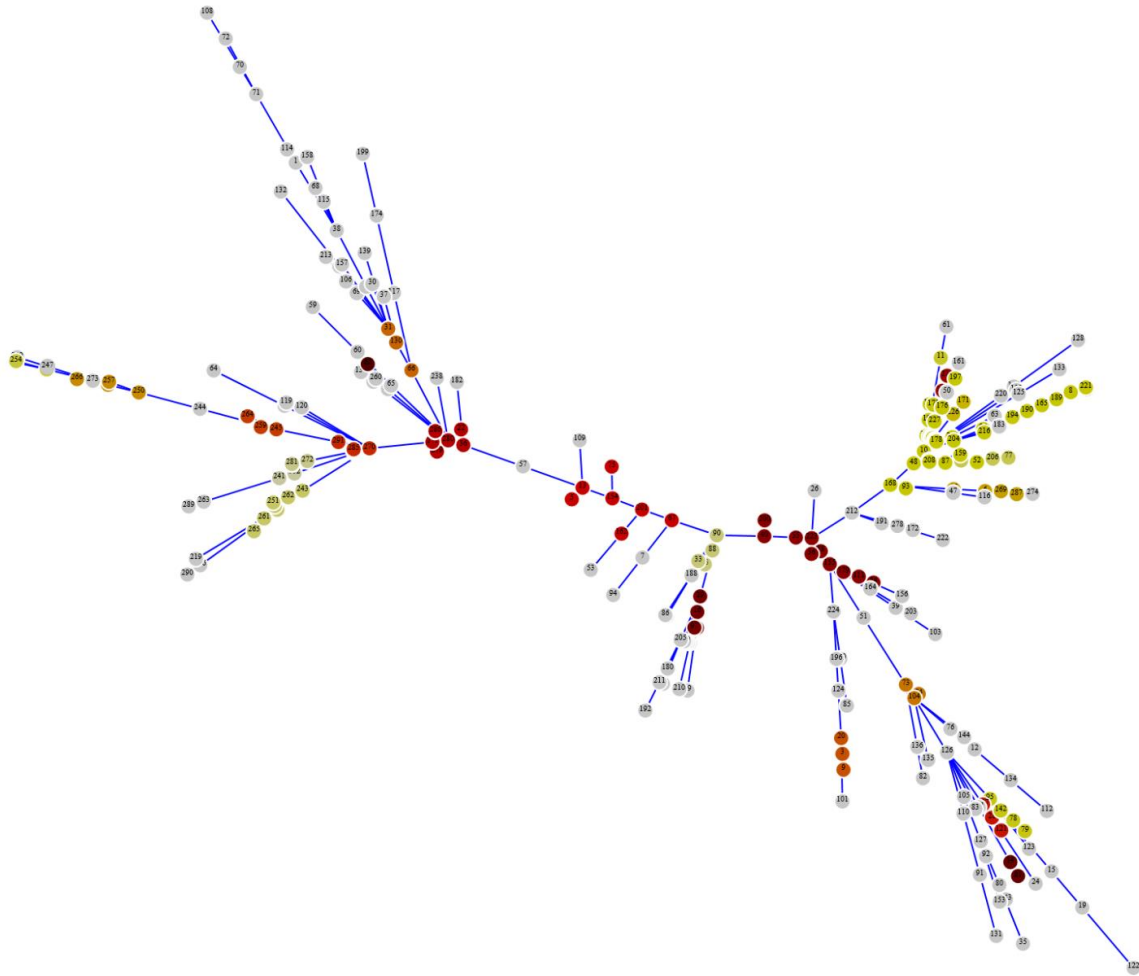

34  
35

36 **Figure S3** A diagram of sequence typing for the three *mcr-1*-positive *E. coli*  
37 isolates (E15004, E15015 and E15017) using the MLST server

38

39 The three strains (E15004, E15015 and E15017) were assigned to ST40, ST642,  
40 and ST648, respectively.
